# Supplementary material for: Extraperitoneal caesarean advantages: Less pain, faster recovery, no formation of intraperitoneal adhesions and future prevention against new antibiotic-resistant bacterial strains?
Source: Research Square preprint supplement (doi:10.21203/rs.3.rs-2622326/v1), 2023-03-10
Supplement: Supplementary file 1 [file 11ff44ed1661af826ba36210.docx]

**Graph 1. Use of the NSAID diclofenac in both groups at 6, 12, and 18 hours after caesarean section**

**Graph 2. Use of tramadol+metamizol in both groups EXP and TPC at 3, 6, and 9 hours**

**after caesarean section.**
